# Supplementary material for: Ectopic Expression of a Heterologous Glutaredoxin Enhances Drought Tolerance and Grain Yield in Field Grown Maize
Source: MDPI journal article supplement (doi:10.3390/ijms22105331), 2021-05-19
Supplement: s1 [file s1]

## Supplementary Figures

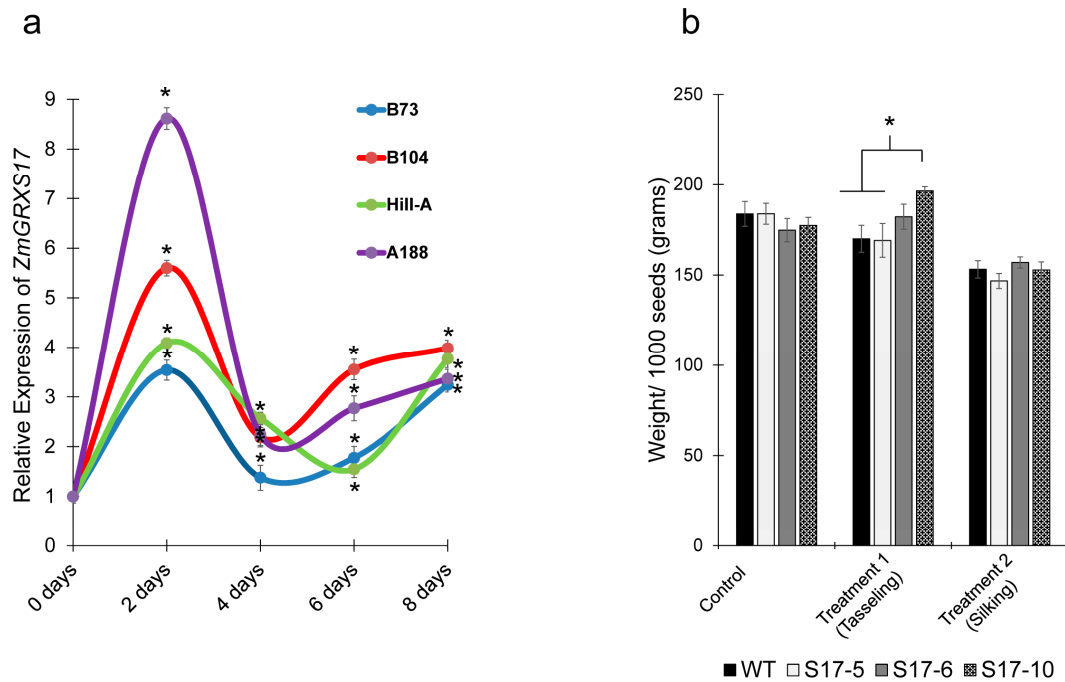

**Supplementary Figure S1** Expression levels of ZmGRXS17 in inbred lines. (a) Time course normalized relative expression of ZmGRXS17 in response to drought over 8-day period in greenhouse (26°C/22°C, day/night) of B73, B104, Hill-A and A188. Leaf samples were collected at 2-day interval. Data shown are Mean  $\pm$  SE (n = 3) and were analyzed using Student's t-test. Asterisks denote the difference between the corresponding time point and day 0 control (\*P<0.05). (b) Weight of 1,000 seeds per plant from maize plants grown in well-watered condition and drought at the VT (n = 12) and R1 (n = 12) stages in the field. Data shown are Mean  $\pm$  SE and were analyzed using one-way ANOVA. Asterisks indicate level of significance (\*P<0.05).

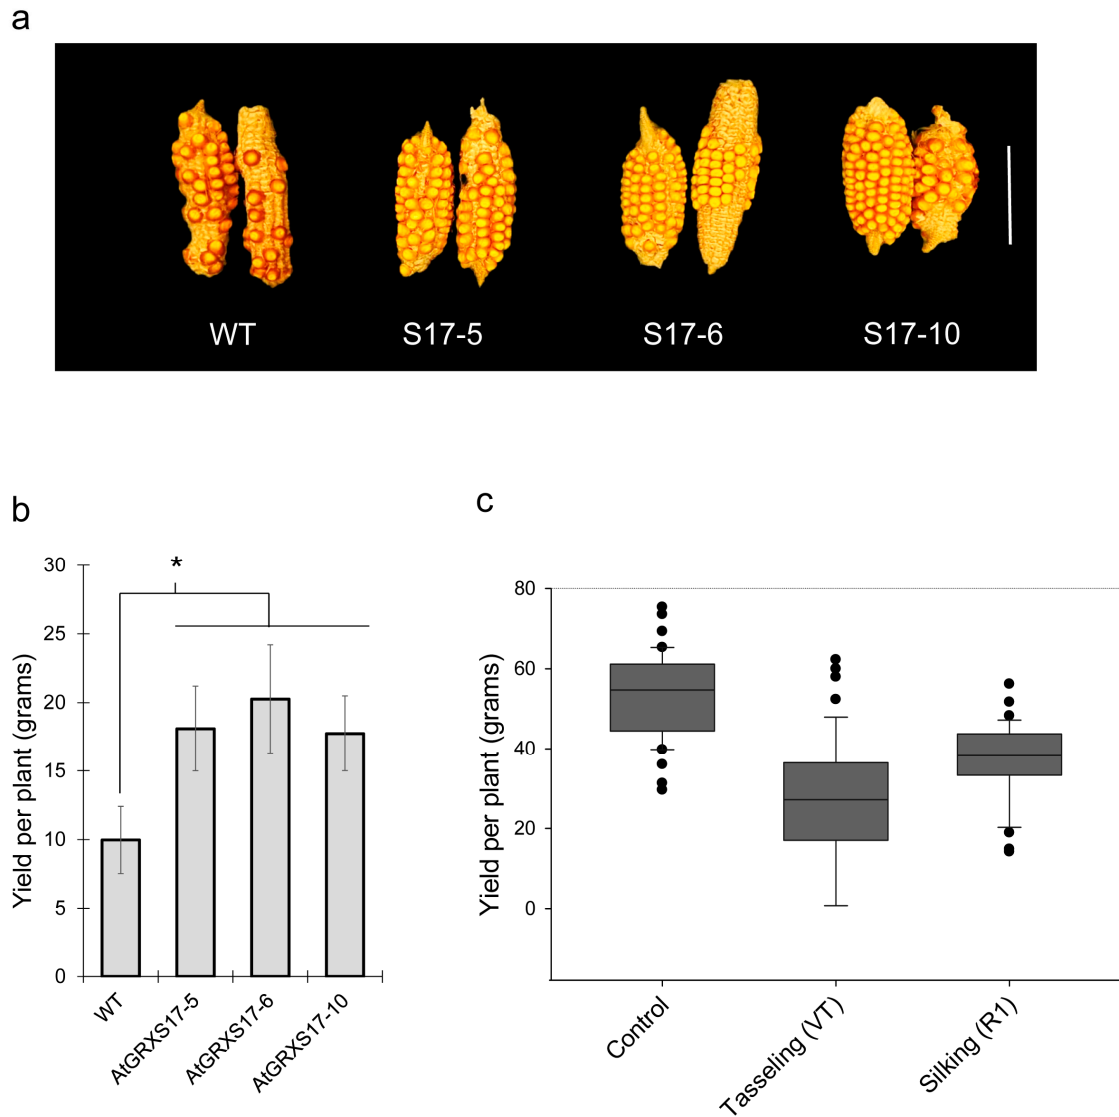

**Supplementary Figure S2** Effect of *AtGRXS17* expression in maize yield under drought stress. **(a)** Representative cobs from WT and *AtGRXS17*-expressing lines grown in the greenhouse under drought condition at VT stage. Scale bar = 10 cm. **(b)** Average yield per maize plant grown under the drought stress in the greenhouse (n = 15). **(c)** Comparison of yield per plant under drought condition at VT and R1 stages. The drought had severe effect in the yield of the maize. The median yield per plant in grams for control, treatment 1 (VT) and treatment 2 (R1) were 54.7 g, 27.2 g and 38.2 g respectively. Data shown are Mean  $\pm$  SE and were analyzed using one-way ANOVA. Asterisks indicate level of significance (\* $P < 0.05$ ).

## Supplementary tables

**Table S1** Primers used for qRT-PCR

| Gene                                   | Gene ID       | Primers                                                           |
|----------------------------------------|---------------|-------------------------------------------------------------------|
| Arabidopsis Glutaredoxin 17 (AtGRXS17) | AT4G04950     | Forward: AGTCGTGCTTCACTTCTGGG<br>Reverse: CCAACCCTAAGCTTGCAGGA    |
| Maize Glutaredoxin 17 (ZmGRXS17)       | GRMZM2G131769 | Forward: CCTGAGTCTGCAACTGAGAAG<br>Reverse: CATCACTGGGCTGGAGTTAAT  |
| Catalase 1 (ZmCAT1)                    | GRMZM2G088212 | Forward: ACAGGCTGTCGTGAGAAGTG<br>Reverse: TACGGTGTTTCATGGGTCACG   |
| L-ascorbate peroxidase (ZmAPX)         | GRMZM2G156227 | Forward: TAAACAGGCCTTCCAGGGG<br>Reverse: TGCCTTTCTGGAGATCGCTG     |
| ABSCISIC ACID-INSENSITIVE 5 (ZmABI5)   | GRMZM2G479760 | Forward: CGCTAAGCCACTCTACTCCG<br>Reverse: GAGAGAGTACACCGACCCCT    |
| Brassinosteroid synthesis 1 (Zmbrs1)   | GRMZM2G065635 | Forward: AGGAAGATGGAGGACAGGCT<br>Reverse: CGTTTATAACCCGGAGTTCTTGC |
| Heat shock protein, 90 KDa (ZmHSP90)   | GRMZM5G833699 | Forward: TTTCGGGTCTGCTCTGAGTG<br>Reverse: CTTGGGCATCTGTTGAGCTTC   |
| Heat Shock protein, 26 KDa (ZmHSP26)   | GRMZM2G149647 | Forward: TGTCCGGAAGCTTCAACGTC<br>Reverse: TTTCTGGTTGGAGACCGTG     |
